# Supplementary material
Source: publisher site journal article supplement (https://www.dovepress.com/article/293032)
Supplement: Supplementary file 1 [file get_supplementary_file.php]

**Supplementary Table**

| **Supplementary Table 1. Distribution of BsmI and ApaI genotypes** | | | |
| --- | --- | --- | --- |
| BsmI | Number (%) | ApaI | Number (%) |
| Total | 506 (100.0) | Total | 506 (100.0) |
| BB | 10 (2.0) | AA | 23 (4.5) |
| Bb | 52 (10.3) | Aa | 237 (46.8) |
| bb | 444 (87.7) | aa | 246 (48.6) |
